# Supplementary material
Source: Springer Nature journal article supplement (http://www.springermedizin.de/resource/supplementary/13027_2009_159_MOESM2_ESM.pdf/25656606)

**A**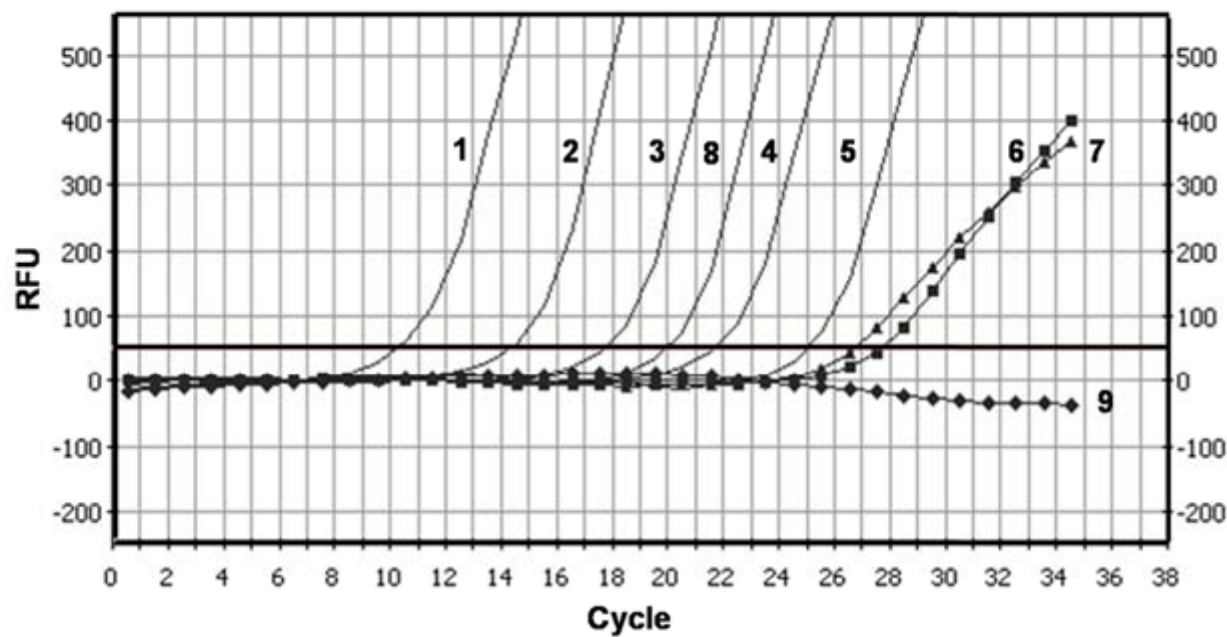**B**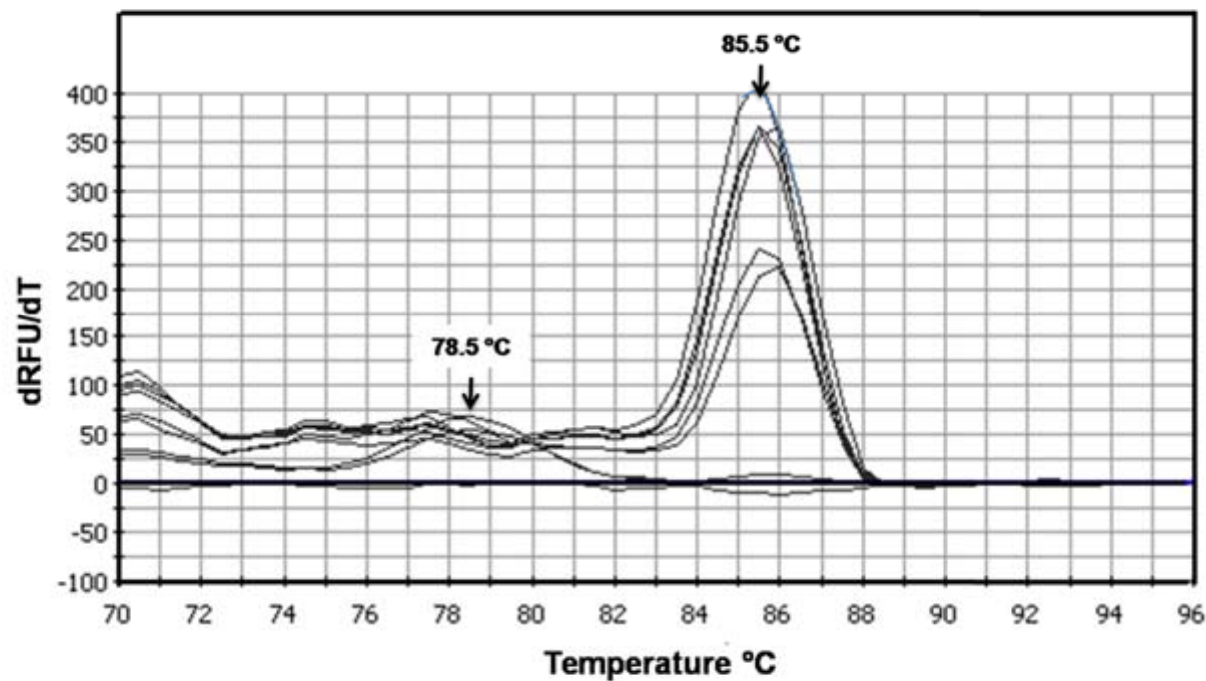

Supplement: MOESM2 [file 25656606]
